# Supplementary material for: An inexpensive, customizable microscopy system for the automated quantification and characterization of multiple adherent cell types
Source: PeerJ journal article supplement (doi:10.7717/peerj.4937), 2018-06-05

**a**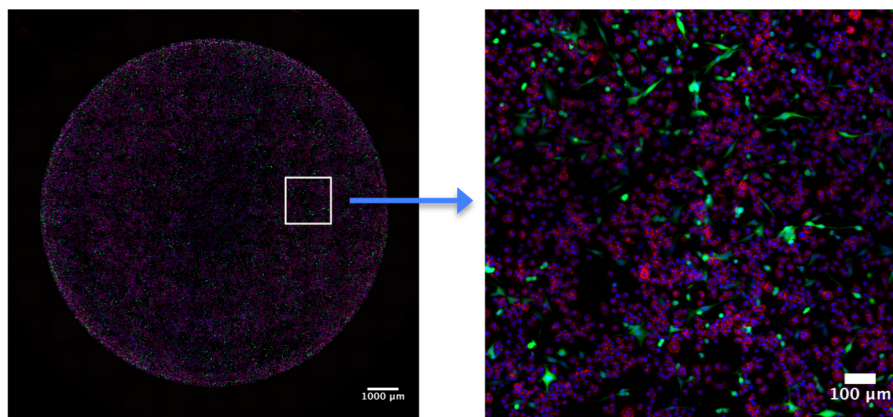**b**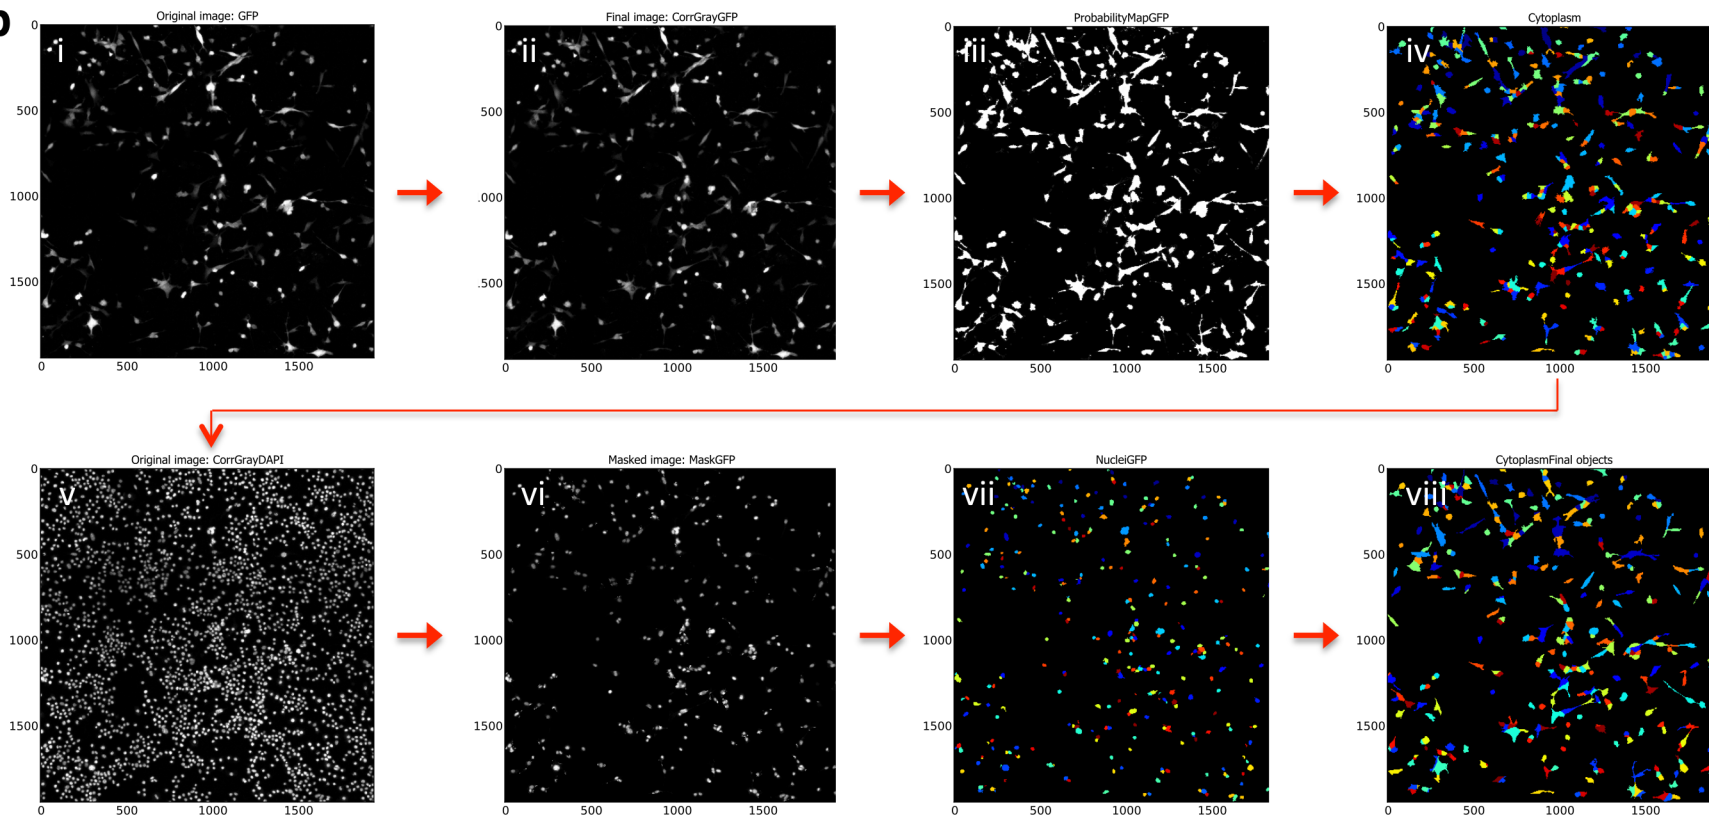

Supplement: Asthana_S3_Fig.pdf [file Asthana_S3_Fig.pdf]
