# Supplementary material for: An inexpensive, customizable microscopy system for the automated quantification and characterization of multiple adherent cell types
Source: PeerJ journal article supplement (doi:10.7717/peerj.4937), 2018-06-05
Supplement: Asthana_S4_Fig.pdf [file Asthana_S4_Fig.pdf]

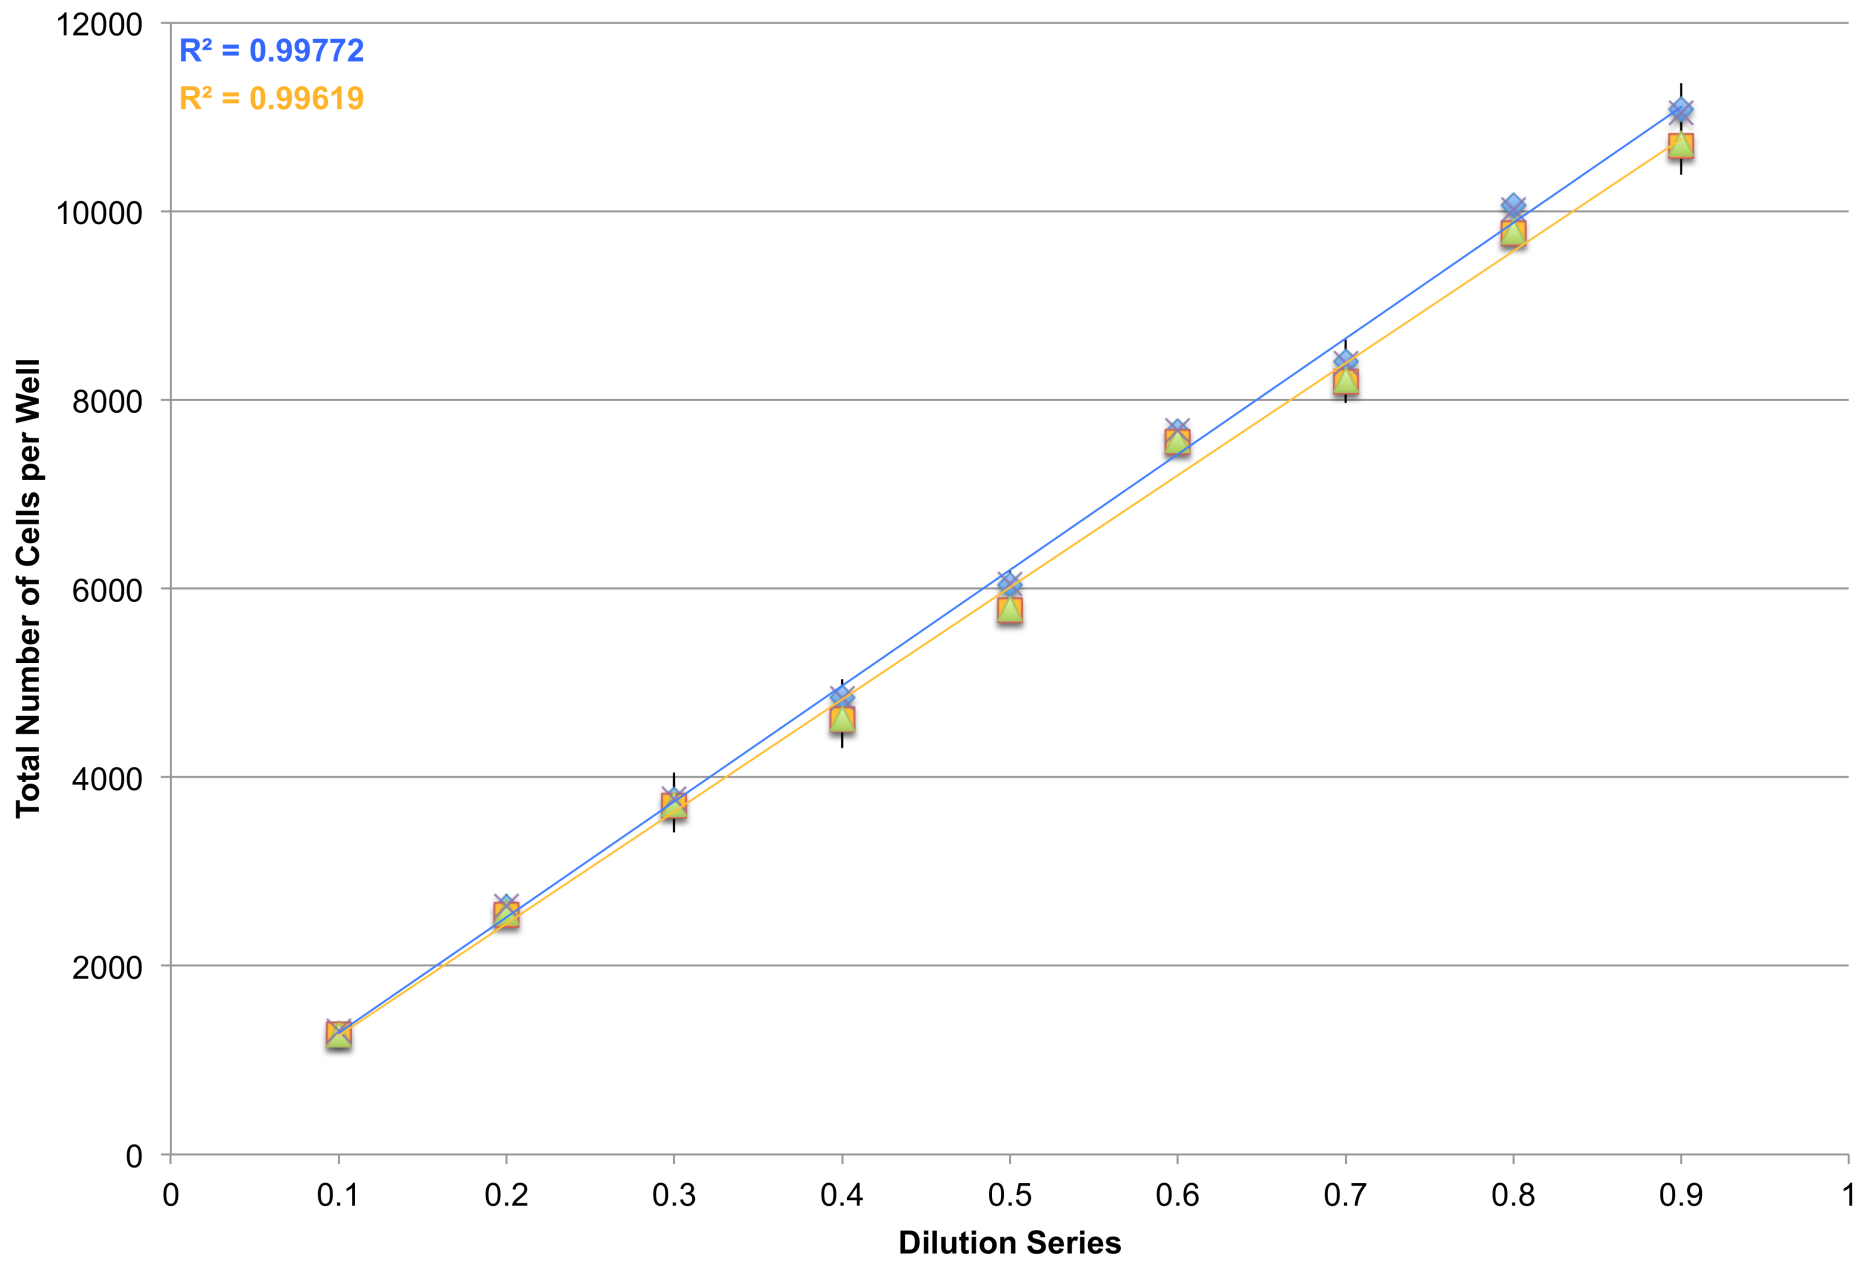

◆ Nuclei Alone      □ Double Mask      ▲ Antibody Mask  
× Cytoplasm Mask      — Linear (Nuclei Alone)      — Linear (Double Mask)
